# Supplementary material
Source: PubMed Central journal article supplement (PMC2646371)

Supplemental figure 1

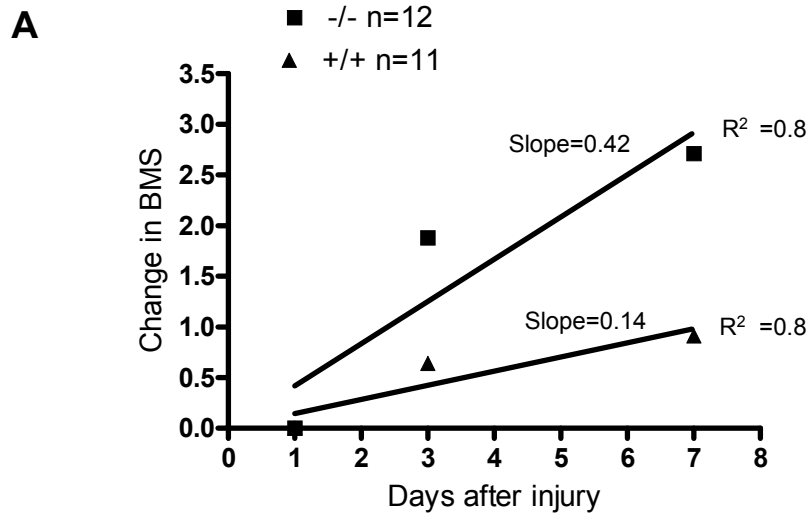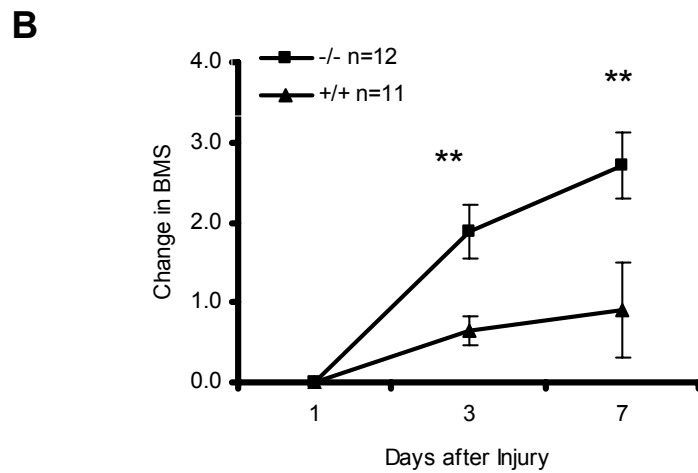

Supplement: NIHMS87538-supplement-Fig__S1.pdf [file NIHMS87538-supplement-Fig__S1.pdf]

Supplemental figure 2

**A**

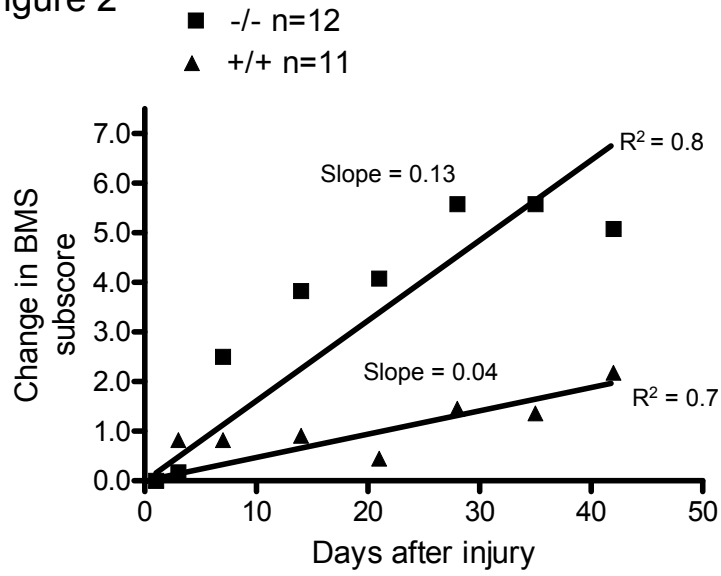

**B**

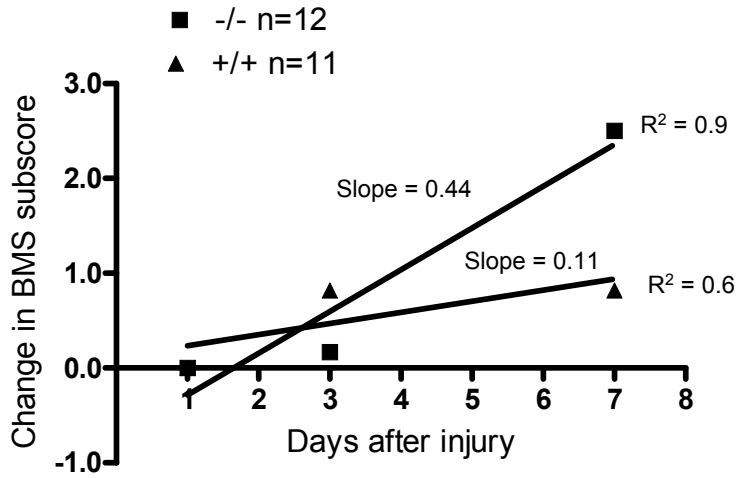

**C**

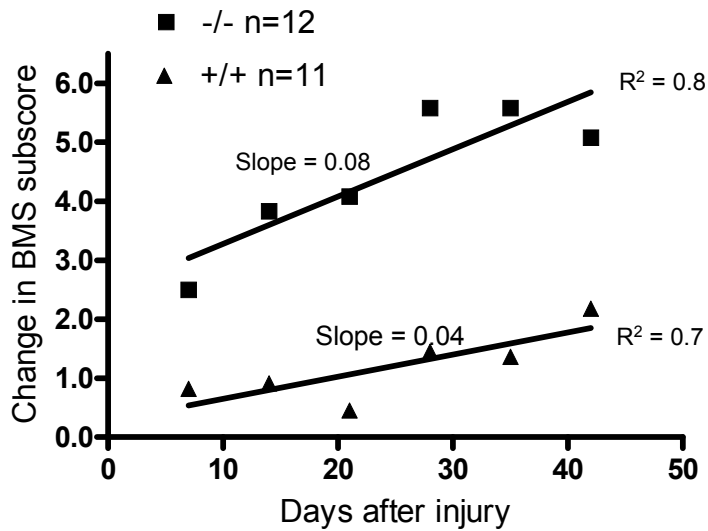

Supplement: NIHMS87538-supplement-Fig__S2.pdf [file NIHMS87538-supplement-Fig__S2.pdf]
